# Supplementary material for: Circadian Clock Gene Period Contributes to Diapause via GABAeric-Diapause Hormone Pathway in Bombyx mori
Source: MDPI journal article supplement (doi:10.3390/biology10090842), 2021-08-30
Supplement: s1 [file s1]

## Supplementary Information for

# Circadian clock gene *Period* contributes to diapause via GABAergic-diapause hormone pathway in *Bombyx mori*

## Supplementary Figures

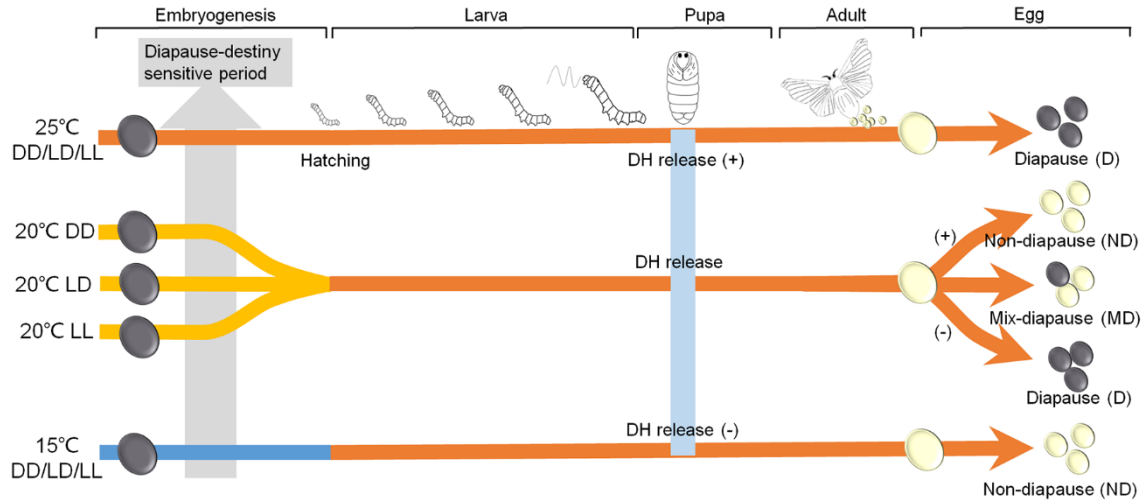

**Supplementary Figure S1. Effect of incubation environment of maternal embryos on diapause of eggs of the next generation.** The diapause of eggs is determined by the mother experienced the environment during their embryonic stage. The female moths lay diapause eggs if experienced a high temperature of 25 °C during their embryonic stage. The female moths lay non-diapause eggs if experienced a low temperature 15 °C during their embryonic stage. If the female moths experienced an intermediate temperature of 20 °C during their embryonic stage, the diapause of their spawn would be determined by day length.

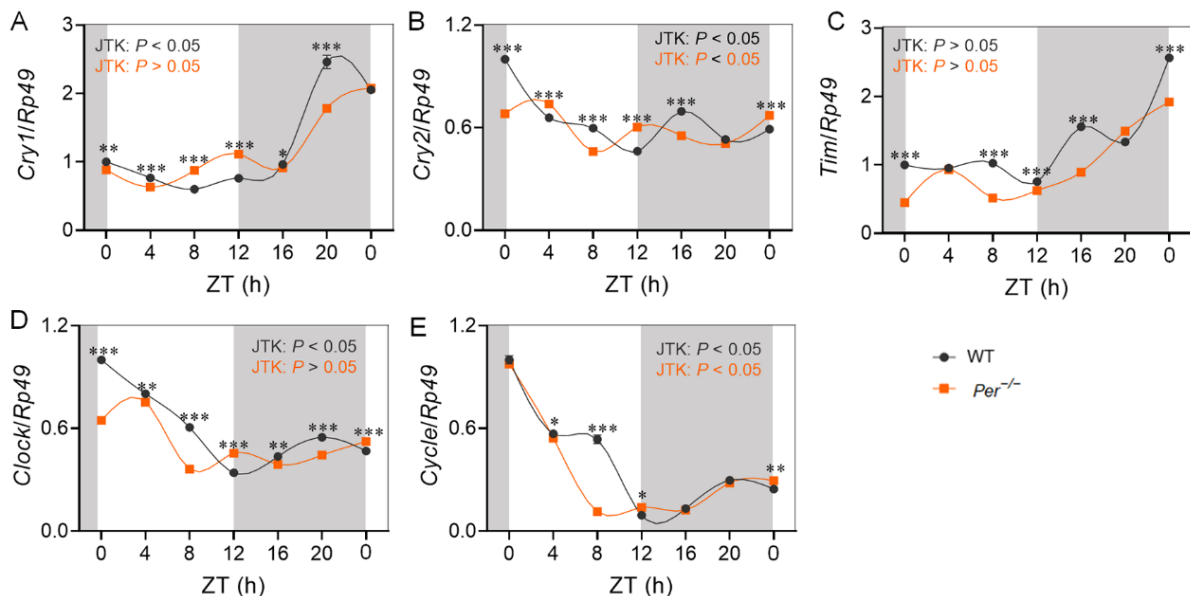

**Supplementary Figure S2. Deletion of *Per* affected the transcription of core member genes of TTFL in silkworm ovary at pupa stage.** ZT0 was set to pupal age 48 h ( $\pm 2$  h), and RNA was extracted from ovaries every 4 h. The mRNA levels of *Cry1* (A), *Cry2* (B), *Tim* (C), *Clock* (D) and *Cycle* (E) were detected by qRT-PCR, and the reference gene was *Rp49*. The rhythm of gene transcription level in day and night (24 h) was analyzed by JTK\_CYCLE software. JTK:  $P > 0.05$  and  $P < 0.05$  indicated that gene expression rhythm existed or not, respectively. The white and dark background represent light and dark periods, respectively. \*, \*\* and \*\*\* indicates  $P < 0.05$ ,  $P < 0.01$  and  $P < 0.001$  between *Per*<sup>-/-</sup> and WT, respectively (n = 3).

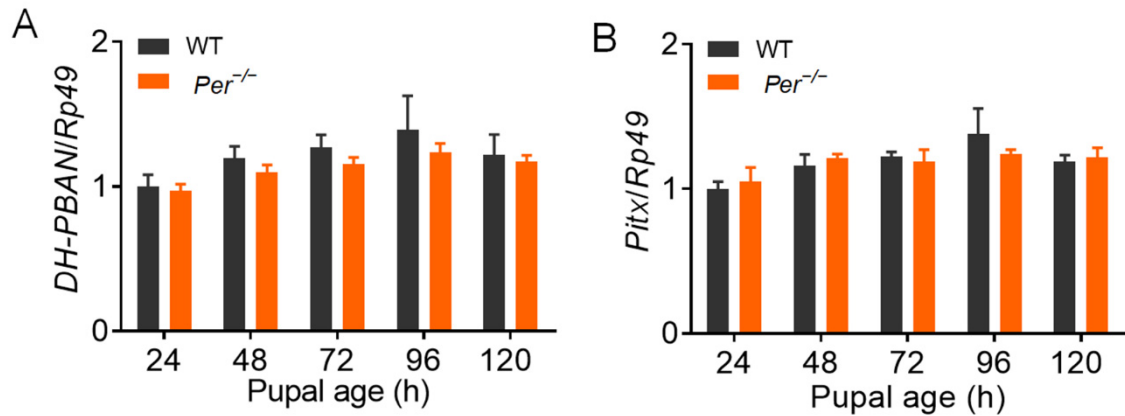

**Supplementary Figure S3. Transcription levels of DH related genes.** qRT-PCR was used to detect the transcription levels of DH synthesis gene *DH-PBAN* (A) and transcription factor *Pitx* (B) in Br-SG of female pupae. The reference gene was *Rp49*.  $P > 0.05$ , there was no significant difference between WT and *Per*<sup>-/-</sup> at all pupal ages ( $n = 3$ ).

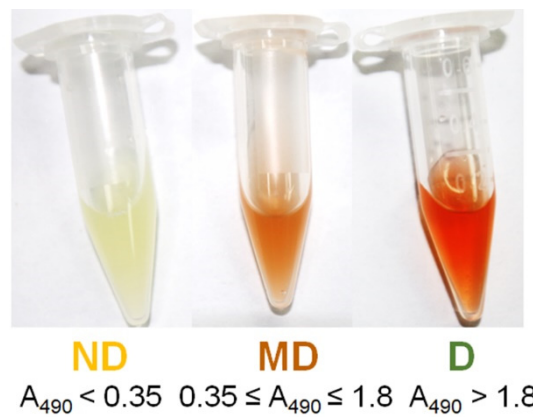

**Supplementary Figure S4. Diapause classification criteria of the 3-hydroxykynurenine color reaction.** Take the ND, MD and D-type batches as reference, the absorbance value of Ehrlich's diazo reaction was used as diapause classification criteria to evaluate the diapause of offspring eggs.  $A_{490 \text{ nm}} < 0.35$  determined by Ehrlich's diazo reaction was defined as a non-diapause batch (ND),  $0.35 \leq A_{490 \text{ nm}} \leq 1.8$  was defined as a mixed batch (MD),  $A_{490 \text{ nm}} > 1.8$  was defined as a diapause batch (D).

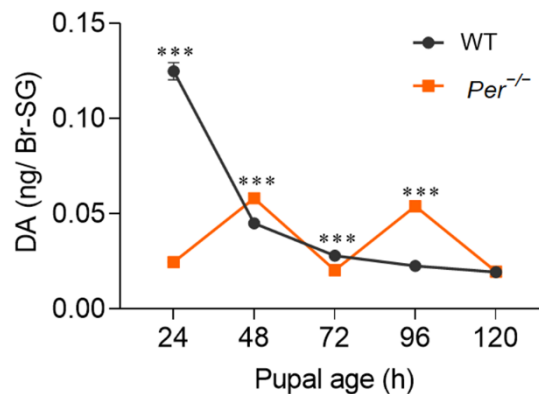

**Supplementary Figure S5. Influence of *Per* knockout on the content of DA in Br-SG of pupae.** LC-MS/MS were used to measure the content of DA in female Br-SG. The whole generation of silkworms were incubated at 25LD. The significance of difference is: \*\*\*  $P < 0.001$ .  $n = 3$ .

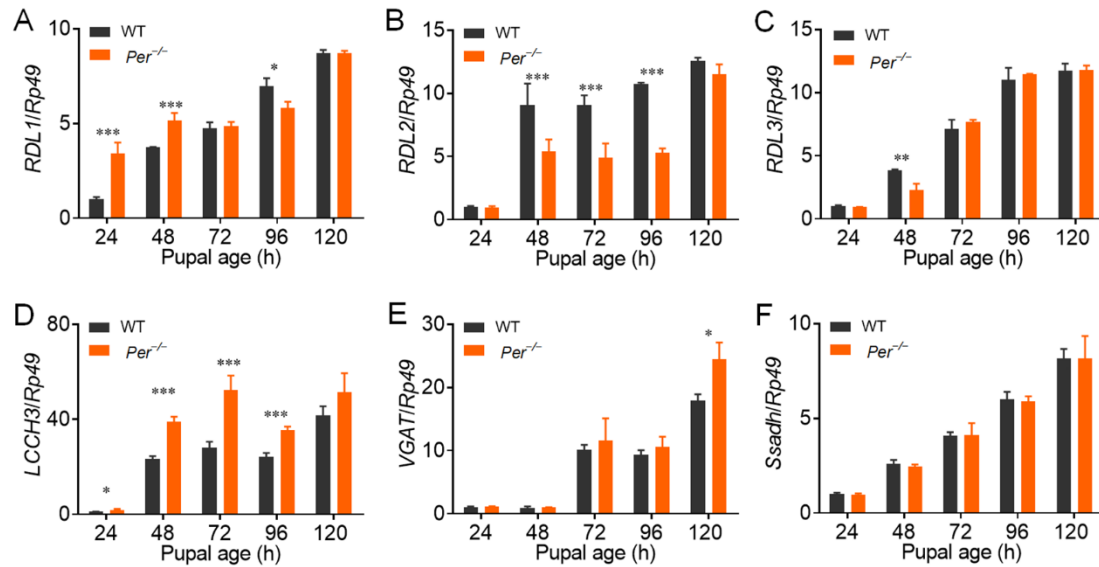

**Supplementary Figure S6. Effects of *Per* gene knockout on the expression of GABAergic neurotransmitter related genes during the pupa stage.** *RDL1*, *RDL2*, *RDL3* and *LCCH3* are the four receptor subunits of GABA; *VGAT*, vesicular GABA transporter; *Ssadh*, succinic semialdehyde dehydrogenase. After 25LD incubation for the eggs hatching, the larvae and pupae were under 25LD. qRT-PCR was used to determine the gene transcription levels of Br-SG in the female at pupal ages of 24-120 h (n = 3). The reference gene was *Rp49*. The significant difference is: \*  $P < 0.05$ , \*\*  $P < 0.01$ , and \*\*\*  $P < 0.001$ .

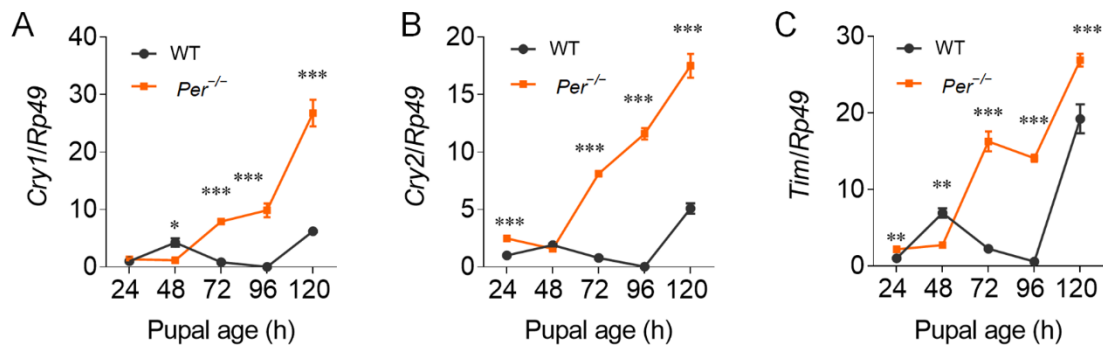

**Supplementary Figure S7. Effect of knocking out *Per* gene on the expression of clock genes in Br-SG of female pupae.** The eggs incubation, larval and pupal stages was maintained under 25LD. Gene transcription levels in the female Br-SG at pupal ages of 24 h to 120 h were measured by qRT-PCR. The reference gene was *Rp49*. The significance of the difference indicates that \*  $P < 0.05$ , \*\*  $P < 0.01$  and \*\*\*  $P < 0.001$ , n = 3.

**Supplementary Table S1. Sequence of primers and dsRNA**

| Using       | Gene name      | Name       | Sequence (5'-3')         |
|-------------|----------------|------------|--------------------------|
| Genomic PCR | <i>Period</i>  | Per-F      | TTGGAAAAGTTTGTGGCTAATA   |
|             |                | Per-R      | ACGATTGGCGATAGGGAAA      |
| RT-PCR      | <i>Period</i>  | Per-F      | GAAACGGAAACTGTATCGC      |
|             |                | Per-R      | GAGGCAACAGAAGTAGTCA      |
|             | <i>Rp49</i>    | Rp49-F     | ACTCTGATGCTGAGCTGCTG     |
|             |                | Rp49-R     | GACCTGTTTACAGGCCGACA     |
| qRT-PCR     | <i>Cry1</i>    | Cry1-F     | CCACGACAATCCGTCTCTT      |
|             |                | Cry1-R     | GGTTGTACCCGACCACTTTTCG   |
|             | <i>Cry2</i>    | Cry2-F     | TTGTCCGTGAAGAGAGAGCG     |
|             |                | Cry2-R     | AGAGAGAAAAGCCTGGGTGG     |
|             | <i>Tim</i>     | Tim-F      | CTCTGCTCGGTCTTGTCATT     |
|             |                | Tim-R      | TGCACGGCTTGAGACCATTA     |
|             | <i>Clock</i>   | Clock-F    | TGAACTCACATCCTGCTACT     |
|             |                | Clock-R    | CTTTCTTGCTTGCGTTT        |
|             | <i>Cycle</i>   | Cycle-F    | AAACGGAAACCATCGTCCTA     |
|             |                | Cycle-R    | TTTGTTCCTTGTCGGGAGTG     |
|             | <i>Treh-2</i>  | Treh-2-F   | GTGTCGTTGCTGATCGTAGCA    |
|             |                | Treh-2-R   | GCCCGTGGCAGTAAATCATAC    |
|             | <i>DH-PBAN</i> | DH-PBAN-F  | AGCGATCAATGAAGCCATCCACTG |
|             |                | DH-PBAN-R  | TGCCTCTCGTAAGGTAGCTGGTC  |
|             | <i>DHR</i>     | DHR-F      | GACACCGCAAATGCTTCG       |
|             |                | DHR-R      | ACCCAATAACCCTGATACAAATA  |
|             | <i>Pitx</i>    | Pitx-F     | GGTGTGCTCCGTGCCCTTAC     |
|             |                | Pitx-R     | TGATGAGTGCTGCTTCGCCTTC   |
|             | <i>GAD</i>     | GAD-F      | TACCAAGTCAAAACCGGGCA     |
|             |                | GAD-R      | ATCAAGATGAAGACCGGGGC     |
|             | <i>GRD</i>     | GRD-F      | TTATCCTTGGCAGCTACGCC     |
|             |                | GRD-R      | CGGTGTGCCTTTTGAGGTTG     |
|             | <i>RDL1</i>    | RDL1-F     | TCCAGAATGCCCTCCAG        |
|             |                | RDL1-R     | AAAACGGACTTCAGATGGTCT    |
|             | <i>RDL2</i>    | RDL2-F     | TACCACCTAGCCGATCTTCG     |
|             |                | RDL2-R     | TTGTCCTCCTGCTTCTTCGT     |
|             | <i>RDL3</i>    | RDL3-F     | TTCGCTACAAGGTCCGAGAT     |
|             |                | RDL3-R     | GTTCATCCTGCTCCTGCTG      |
|             | <i>LCCH3</i>   | LCCH3-F    | ATCCACTCGACAGCCAGAAC     |
|             |                | LCCH3-R    | TGGGGTAGTTCAGCGTCTTC     |
|             | <i>Ssadh</i>   | Ssadh-F    | TGAATTTGGCATGGTTGCTA     |
|             |                | Ssadh-R    | CCTTCACGCCCTATACCAGA     |
|             | <i>GABAT</i>   | GABAT-F    | CAAGACCGGAAAGGTTTTGA     |
|             |                | GABAT-R    | TCGGCCACGAACACTATGTA     |
|             | <i>VGAT</i>    | VGAT-F     | GGATGGAATTGCTCCAAGAA     |
|             |                | VGAT-R     | TTTAGCTCCTGGCTTTCCA      |
|             | <i>GAT</i>     | GAT-F      | TCTTCAATCTCGTGCAGTGG     |
|             |                | GAT-R      | GTGACACGCCACAGGTACAC     |
| RNAi        | <i>Rp49</i>    | Rp49-F     | GCATCAATCGGATCGCTATG     |
|             |                | Rp49-R     | GGACCTTACGGAATCCATTG     |
|             |                | GAD-333-F  | GCAAAUAGCAGAGCAUUAUATT   |
|             |                | GAD-333-R  | UAUAUGCUCUGCUAUUUGCTT    |
|             |                | GAD-1691-F | GGAUUCCUCAUGAUGCCAATT    |
|             |                | GAD-1691-R | UUGGCAUCAUGAGGAAUCCTT    |
